# Supplementary material for: Advantageous electrochemical behaviour of new core–shell structured cathodes over nickel-rich ones for lithium-ion batteries
Source: Royal Society of Chemistry journal article supplement (doi:10.1039/d4ta05506c), 2024-01-01
Supplement: d4ta05506c1.pdf [file d4ta05506c1.pdf]

## Supplementary information

### Advantageous Electrochemical Behaviour of New Core-Shell Structured Cathodes over Nickel-Rich Ones for Lithium-Ion Batteries

Yuvashri Jayamkondan,<sup>a</sup> Boris Markovsky,<sup>b</sup> Doron Aurbach,<sup>b</sup> Prasant Kumar Nayak<sup>a,\*</sup>

<sup>a</sup>*Materials Electrochemistry Research Laboratory, Department of Chemistry,*

*SRM Institute of Science and Technology, Kattankulathur, Chennai, India - 603203.*

<sup>b</sup>*Department of Chemistry, BINA – BIU Institute of Nanotechnology and Advanced materials,*

*INIES – Israel National Institute for Energy Storage Bar-Ilan University, Ramat Gan-*

*5290002, Israel*

\*E-mail: [prasantn1@srmist.edu.in](mailto:prasantn1@srmist.edu.in)

**Table S1.** Electrochemical characteristics of initial cycles (0.1 C) for the synthesized cathodes.

| Samples | Charge capacity / mAh g <sup>-1</sup> | Discharge capacity / mAh g <sup>-1</sup> | Coulombic efficiency / % | Irreversible capacity loss / % |
|---------|---------------------------------------|------------------------------------------|--------------------------|--------------------------------|
| NMC85   | 267                                   | 216                                      | 81                       | 19                             |
| NR-CS   | 255                                   | 212                                      | 83                       | 17                             |
| NR-LR   | 183                                   | 140                                      | 76                       | 24                             |

**Table S2.** Electrodes resistances parameters for NMC85, NR-CS and NR-LR electrodes extracted from the EIS measurements.

| Electrodes | R <sub>s</sub> (Ω) | R <sub>sf</sub> (Ω) | R <sub>ct</sub> (Ω) |
|------------|--------------------|---------------------|---------------------|
| NMC85      | 5.129              | 21.75               | 7844                |
| NR-CS      | 6.770              | 37.15               | 2453                |
| NR-LR      | 6.170              | 31.6                | 3419                |

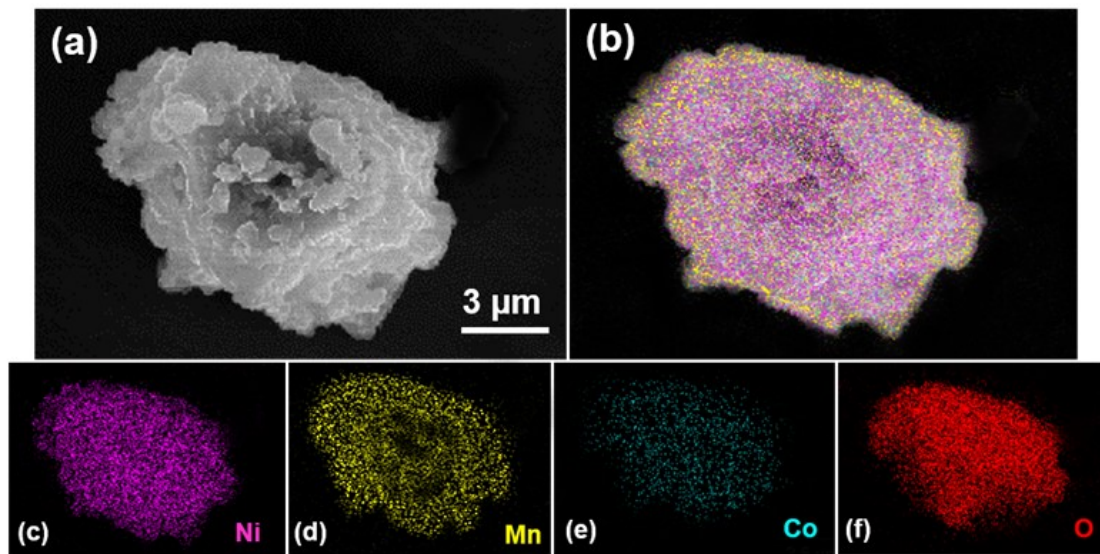

**Fig. S1.** HRSEM elemental mapping of NR-CS cathode, (a) NR-CS at 3 μm scale bar, (b) all elements, (c) Ni, (d) Mn, (e) Co, and (f) O.

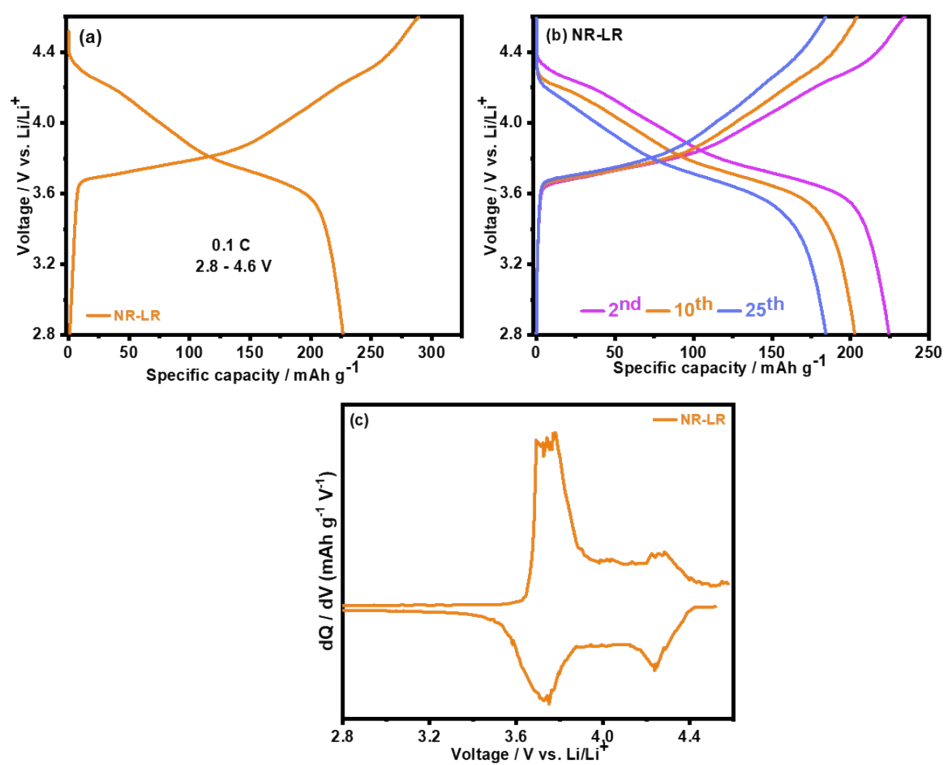

**Fig. S2.** Initial cycle, cycling & voltage profile for the 2<sup>nd</sup>, 10<sup>th</sup>, & 25<sup>th</sup> cycles and initial dQ/dV vs. V plot of NR-LR in the voltage range of 2.0-4.6 V at 0.1 C (25 °C).

Because of small proportion of Li-rich phase in the integrated material NR-LR, the high voltage activation plateau is not clearly observed as previously reported.<sup>39</sup>

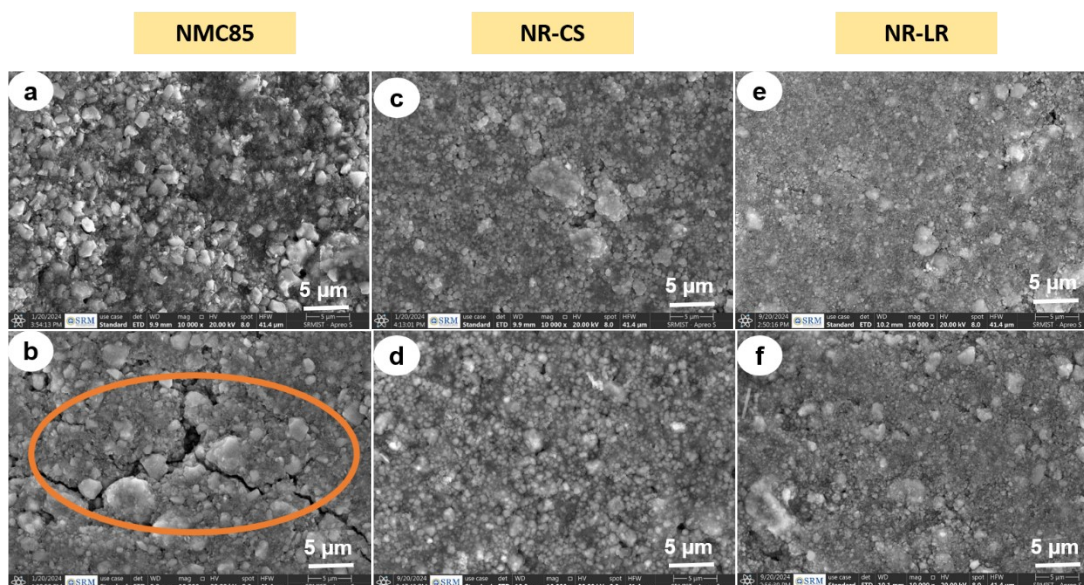

**Fig. S3.** SEM images of pristine (uncycled) and cycled (after 120 cycles) electrodes. Ni-rich NMC85 (a, b), NR-CS (c, d) and NR-LR (e, f). The scale bar is 5 μm.

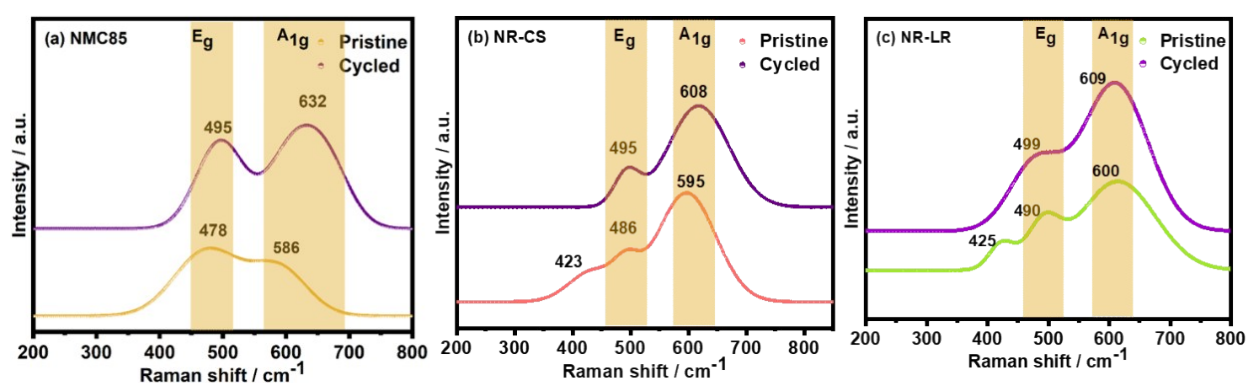

**Fig. S4.** Raman spectra of Ni-rich NMC85 (a), Ni-rich and Mn-based Li-rich NR-CS (b) and NR-LR (c) layered oxide cathodes: Pristine (uncycled) and cycled (after 120 cycles) electrodes as indicated.

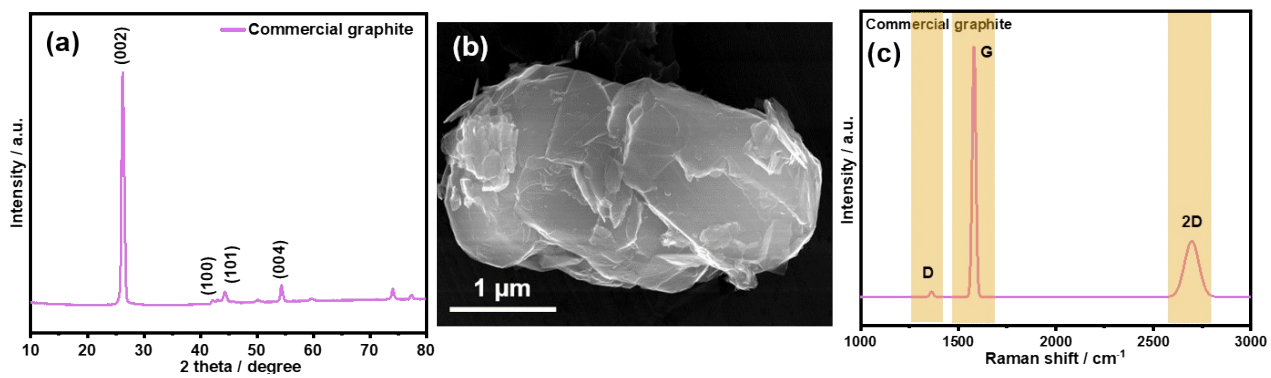

**Fig. S5.** Commercial graphite powder: (a) XRD pattern, (b) SEM images in the scale bar of 1  $\mu\text{m}$  and (c) Raman spectra.
